# Supplementary material for: The IL-10 receptor inhibits cell extrinsic signals necessary for STAT1-dependent macrophage accumulation during colitis
Source: PubMed Central journal article supplement — Mucosal Immunol. Author manuscript; Available in PMC 2023 Aug 16. (PMC10431098; doi:10.1016/j.mucimm.2023.02.006), 2023-03-02

**Supplementary Figure 1. (A)** Schematic showing timing of *H. hepaticus* (*Hh*) infection and anti-IL-10RA Ab administration in model used here. **(B)** Representative histology images (10x) from proximal colonic tissue from sham treated or *Hh* infected and anti-IL-10RA Ab treated WT and *Stat1*<sup>-/-</sup> mice (***Hh* + Ab**) **(C)** Gene expression by qRT-PCR from colonic tissue. Results are pooled from a minimum of three independent experiments, and median values are shown. Statistical significance was determined by nonparametric Mann-Whitney U test. \*\**p*<0.01 \*\*\*\**p*<0.0001 **(D)** Gating strategy to identify lamina propria macrophages in *Stat1*<sup>-/-</sup> or *Ifngr1*<sup>-/-</sup> mice. Single cell suspensions from lamina propria cells were first gated on single cells before gated on live cells. Lamina propria macrophages were identified as CD45<sup>+</sup> CD103<sup>-</sup> Ly6G<sup>-</sup> CD11b<sup>+</sup> CD64<sup>+</sup> and cell populations were separated based on Ly6C<sup>+</sup> MHC II<sub>low</sub> (P1), Ly6C<sup>high</sup> MHC II<sub>high</sub> (P2) and Ly6C<sup>-</sup> MHC II<sub>high</sub> (P3/P4). Data shows one representative experiment. **(E)** Percent of circulating monocytes in mice of indicated genotype (CD45<sup>+</sup>/(CD11b<sup>+</sup> Ly6G<sup>-</sup> Ly6C<sup>+</sup> cells)).

**Supplementary Figure 2. (A)** Histopathologic scores of WT and *Ifngr1*<sup>-/-</sup> mice with or without *Hh* and anti-IL-10RA Ab treatment. **(B)** Gene expression by qRT-PCR from colonic tissue. Results are pooled from two independent experiments and median values are shown. Statistical significance was determined by nonparametric Mann-Whitney U test. \*\**p*<0.01 \*\*\*\**p*<0.0001.

**Supplementary Figure 3. (A)** Scheme for generation of bone marrow chimeras. WT hosts were reconstituted with either WT or STAT1-deficient bone marrow. **(B)** Gene expression by qRT-PCR from pooled colonic tissue from the same experiment. Results are shown from one of two experiments with similar results. Statistical significance was determined by nonparametric Mann-Whitney U test. Median values are shown; \**p*<0.05 \*\**p*<0.01.

**Supplementary Figure 4. (A)** Scheme of generated bone marrow chimeras. *Cdcs1* (CD45.1) (WT) host were reconstituted with either *Cdcs1* (CD45.1) (**WT**), *Cdcs1 Il10ra*<sup>-/-</sup> (CD45.2) (***Il10ra*<sup>-/-</sup>**) or *Cdcs1 Il10ra*<sup>-/-</sup> *Stat1*<sup>-/-</sup> (CD45.2) (**DKO**) bone marrow cells. **(B)** Representative histology images (10x) from proximal colonic tissue from bone marrow chimeras with H&E staining.

**Supplementary Figure 5.** Gating strategy to identify lamina propria macrophages in bone marrow chimera mice. Single cell suspensions from lamina propria cells were first gated on single cells before gated on live cells. Lamina propria macrophages were identified as CD103<sup>-</sup> Ly6G<sup>-</sup> CD11b<sup>+</sup> CD64<sup>+</sup>. Congenic CD45.1 and CD45.2 staining separated between WT (CD45.1) and different knock out populations (CD45.2). Cell populations were identified based on Ly6C<sup>+</sup> MHC II<sub>low</sub> (P1), Ly6C<sup>high</sup> MHC II<sub>high</sub> (P2) and Ly6C<sup>-</sup> MHC II<sub>high</sub> (P3/P4). Data shows one representative experiment.

# Supplementary Figure 1

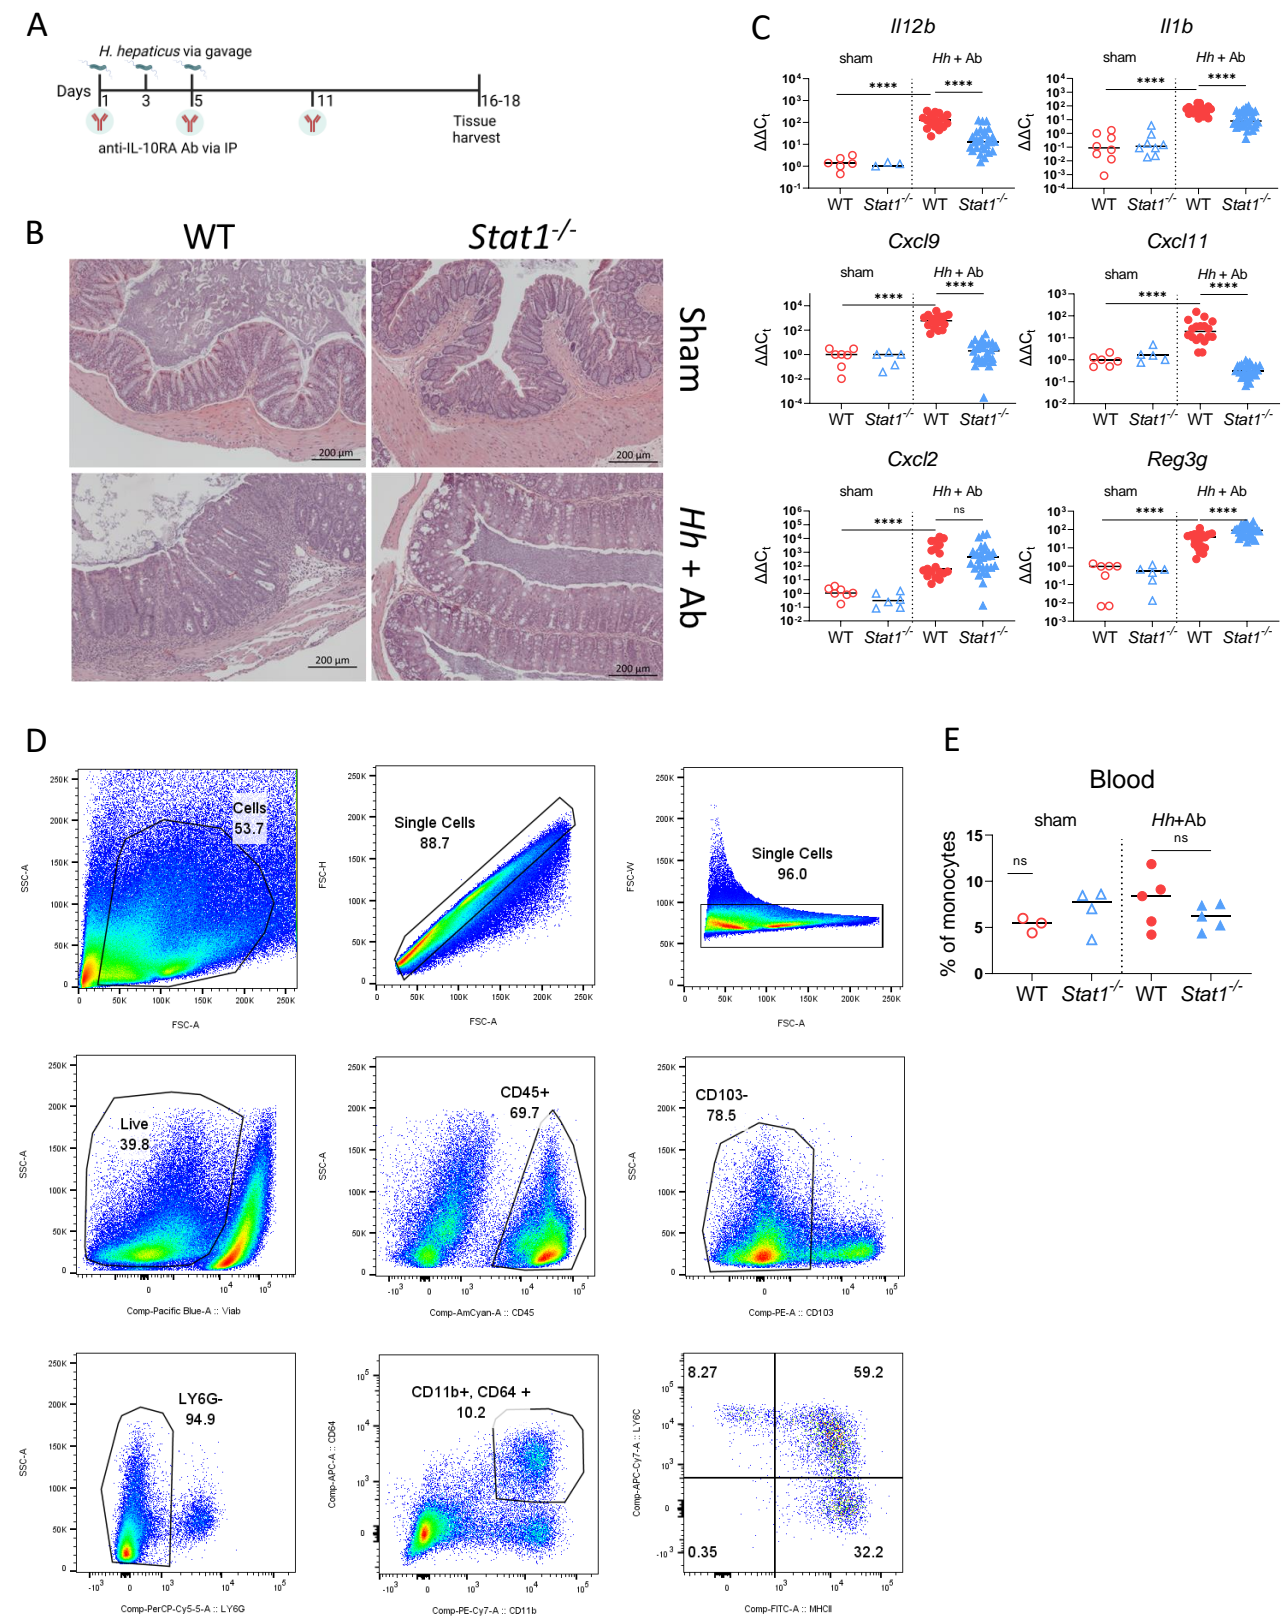

Supplementary Figure 2

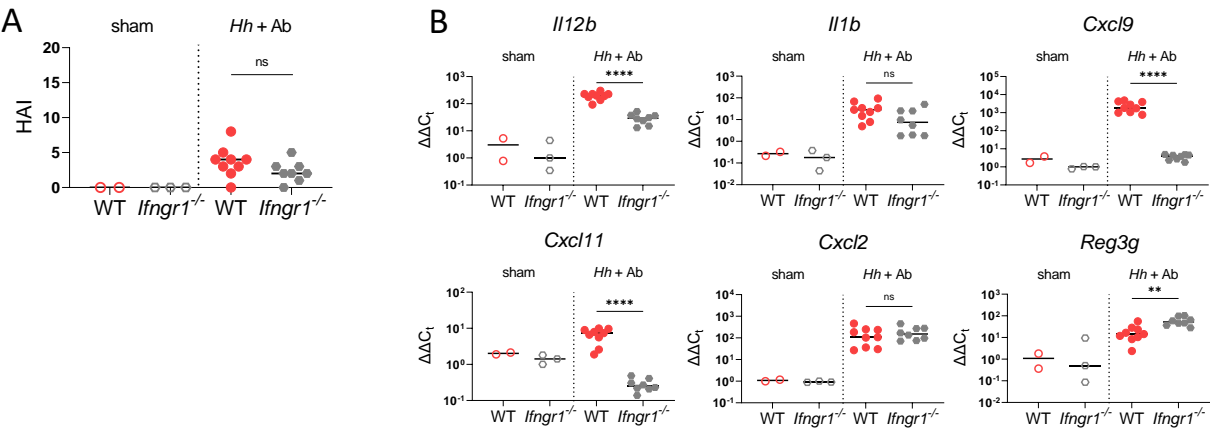

Supplementary Figure 3

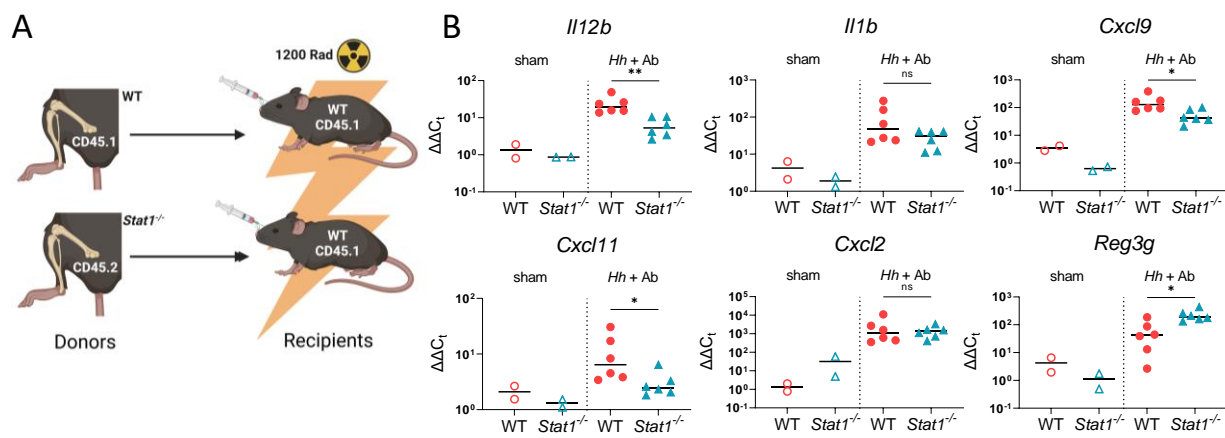

Supplementary Figure 4

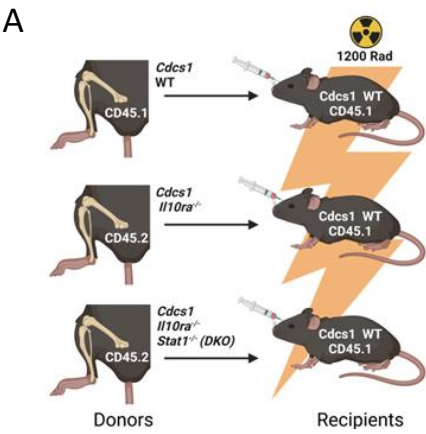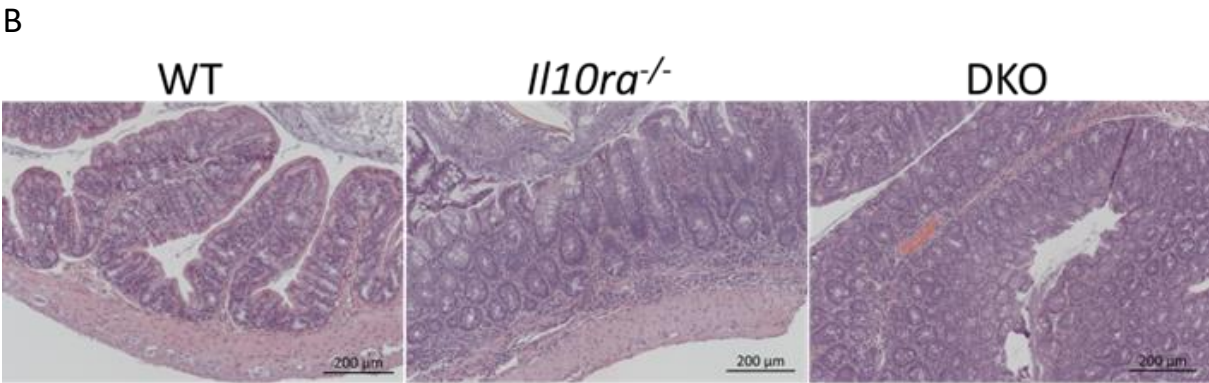

Supplementary Figure 5

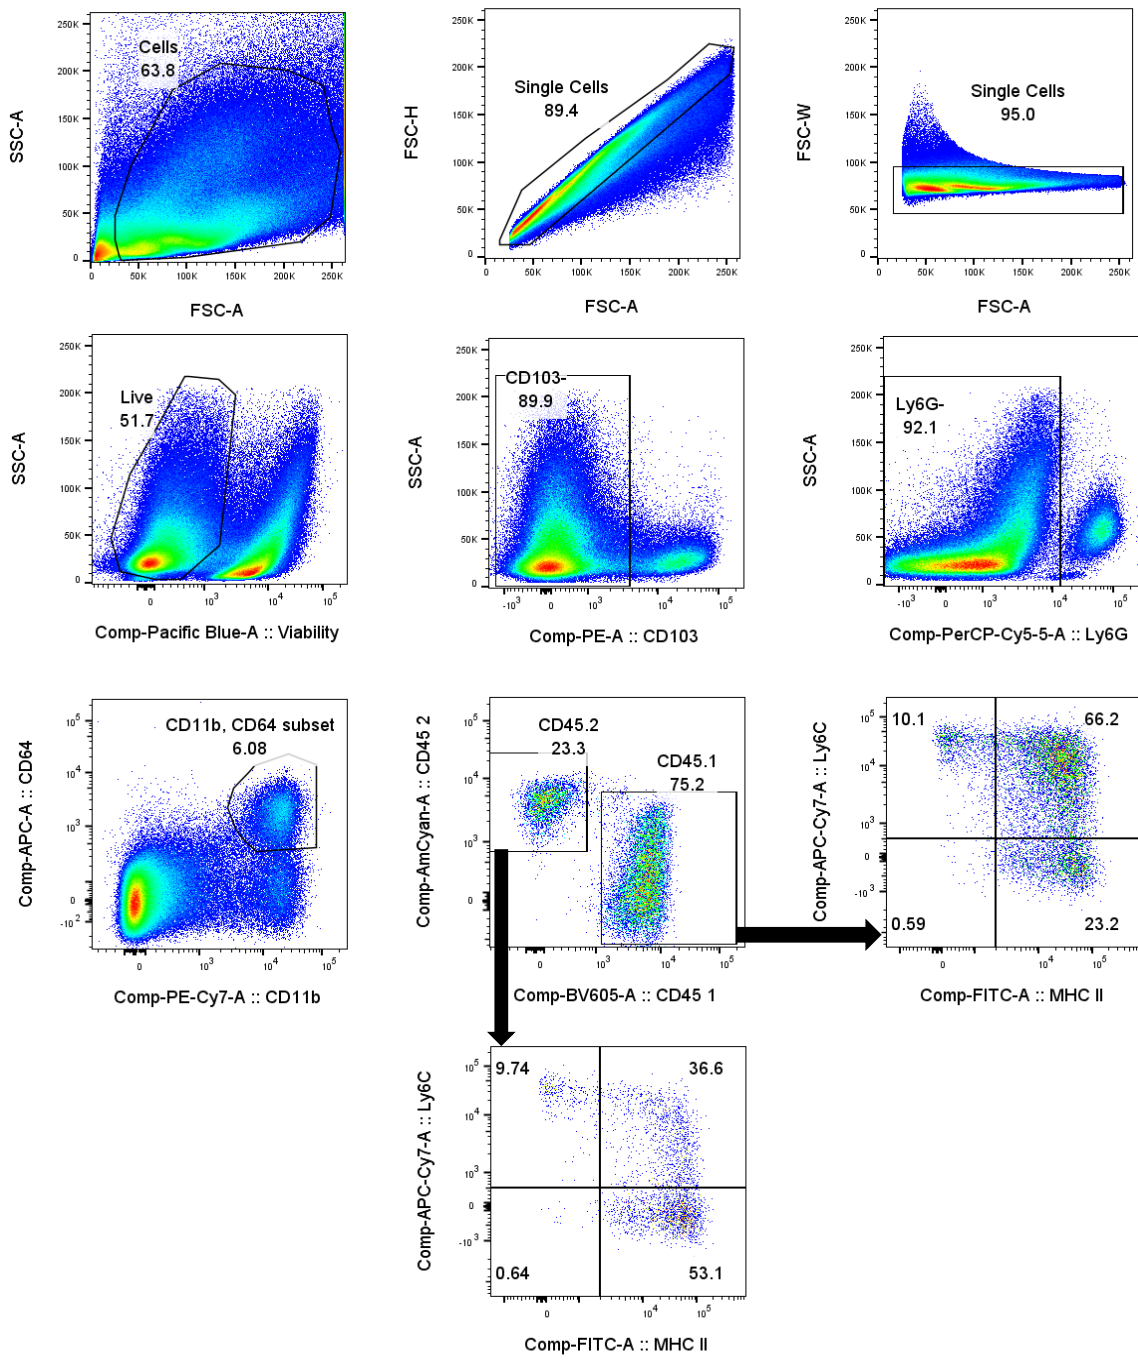

Supplement: NIHMS1909474-supplement-1.pdf [file NIHMS1909474-supplement-1.pdf]
